# Supplementary material for: Biscarbene gold(i) complexes: structure–activity-relationships regarding antibacterial effects, cytotoxicity, TrxR inhibition and cellular bioavailability
Source: Royal Society of Chemistry journal article supplement (doi:10.1039/c7md00269f), 2017-01-01
Supplement: c7md00269f1.pdf [file c7md00269f1.pdf]

### Supporting Information:

## Biscarbene gold(I) complexes: Structure-activity-relationships regarding antibacterial effects, cytotoxicity, TrxR inhibition and cellular bioavailability

### 1) Protein binding

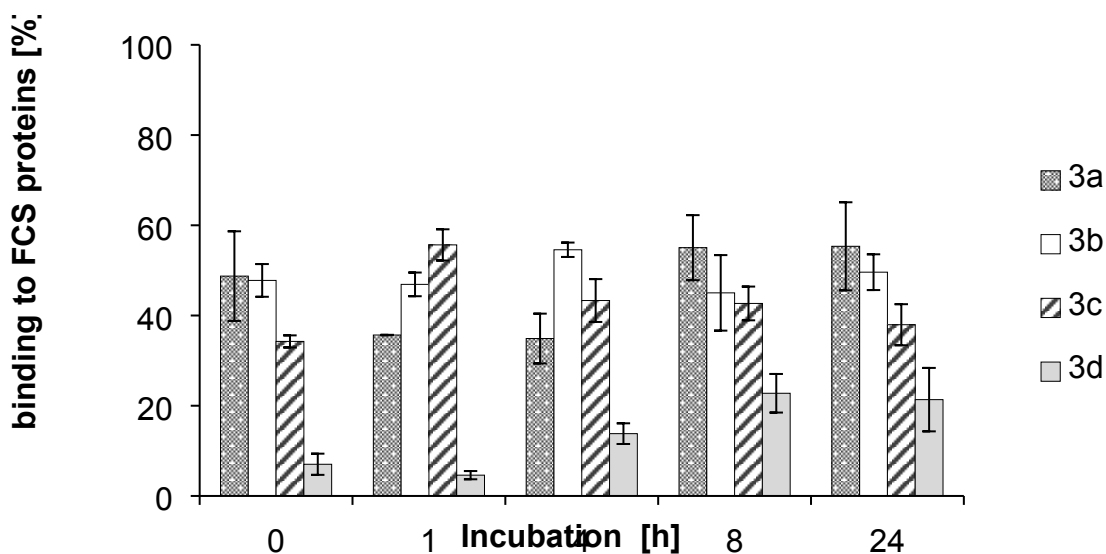

**Scheme S1:** Protein binding of bis-NHC gold(I) complexes **3a** – **3d** to fetal calf serum proteins

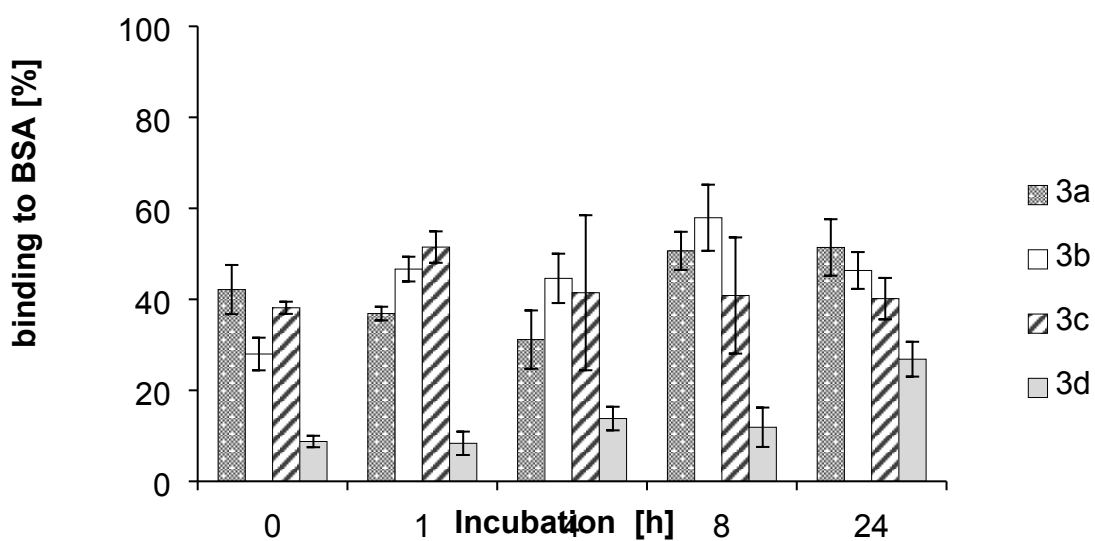

**Scheme S2:** Protein binding of bis-NHC gold(I) complexes **3a** – **3d** to bovine serum albumin
